# Supplementary material
Source: PubMed Central journal article supplement (PMC8316281)

## SUPPLEMENTAL MATERIAL

### Access to Mechanical Thrombectomy for Ischemic Stroke in the United States

Hooman Kamel, MD, MS<sup>1</sup>; Neal S. Parikh, MD, MS<sup>1</sup>; Abhinaba Chatterjee, BS<sup>1</sup>; Luke K. Kim, MD<sup>2</sup>; Jeffrey L. Saver, MD<sup>3</sup>; Lee H. Schwamm, MD<sup>4</sup>; Kori S. Zachrison, MD, MSc<sup>5</sup>; Raul G. Nogueira, MD<sup>6</sup>; Opeolu Adeoye, MD<sup>7</sup>; Iván Díaz, PhD<sup>8</sup>; Andrew M. Ryan, PhD<sup>9</sup>; Ankur Pandya, PhD<sup>10</sup>; Babak B. Navi, MD, MS<sup>1</sup>

<sup>1</sup>Clinical and Translational Neuroscience Unit, Feil Family Brain and Mind Research Institute and Department of Neurology, Weill Cornell Medicine, New York, NY;

<sup>2</sup>Division of Cardiology, Weill Cornell Medicine, New York, NY;

<sup>3</sup>Department of Neurology, University of California, Los Angeles;

<sup>4</sup>Department of Neurology, Massachusetts General Hospital, Boston, MA;

<sup>5</sup>Department of Emergency Medicine, Massachusetts General Hospital, Boston, MA;

<sup>6</sup>Departments of Neurology, Neurosurgery, and Radiology, Emory University School of Medicine, Atlanta, GA;

<sup>7</sup>Department of Emergency Medicine, University of Cincinnati, OH;

<sup>8</sup>Division of Biostatistics and Epidemiology, Weill Cornell Medicine, New York, NY;

<sup>9</sup>Department of Health Management and Policy, University of Michigan School of Public Health, Ann Arbor, MI;

<sup>10</sup>Department of Health Policy and Management, Harvard T.H. Chan School of Public Health, Boston, MA

### Table of Contents

|                         |         |
|-------------------------|---------|
| Supplemental Table I    | Page 2  |
| Supplemental Table II   | Page 3  |
| Supplemental Table III  | Page 4  |
| Supplemental Table IV   | Page 5  |
| Supplemental Table V    | Page 6  |
| Supplemental Table VI   | Page 7  |
| Supplemental Table VII  | Page 8  |
| Supplemental Figure I   | Page 9  |
| Supplemental Figure II  | Page 10 |
| Supplemental Figure III | Page 11 |
| Supplemental Figure IV  | Page 12 |

**Table I. Codes Used to Define Major Variables in Analysis of Access to Thrombectomy for Ischemic Stroke.**

| <b>Service</b>                                                                                                                                                             | <b>Procedure Code</b>              |
|----------------------------------------------------------------------------------------------------------------------------------------------------------------------------|------------------------------------|
| Ischemic stroke                                                                                                                                                            | <i>ICD-10-CM</i> code I63          |
| Mechanical thrombectomy for ischemic stroke                                                                                                                                | <i>ICD-10-CM</i> code 03CG3        |
|                                                                                                                                                                            | <i>ICD-10-CM</i> code 03CH3        |
|                                                                                                                                                                            | <i>ICD-10-CM</i> code 03CI3        |
|                                                                                                                                                                            | <i>ICD-10-CM</i> code 03CJ3        |
|                                                                                                                                                                            | <i>ICD-10-CM</i> code 03CK3        |
|                                                                                                                                                                            | <i>ICD-10-CM</i> code 03CL3        |
|                                                                                                                                                                            | <i>ICD-10-CM</i> code 03CP3        |
| Expanded definition of endovascular therapy for ischemic stroke                                                                                                            | <i>ICD-10-CM</i> code 03CQ3        |
|                                                                                                                                                                            | <i>ICD-10-CM</i> code 03CG3        |
|                                                                                                                                                                            | <i>ICD-10-CM</i> code 03CH3        |
|                                                                                                                                                                            | <i>ICD-10-CM</i> code 03CI3        |
|                                                                                                                                                                            | <i>ICD-10-CM</i> code 03CJ3        |
|                                                                                                                                                                            | <i>ICD-10-CM</i> code 03CK3        |
|                                                                                                                                                                            | <i>ICD-10-CM</i> code 03CL3        |
|                                                                                                                                                                            | <i>ICD-10-CM</i> code 03CP3        |
|                                                                                                                                                                            | <i>ICD-10-CM</i> code 03CQ3        |
|                                                                                                                                                                            | <i>ICD-10-CM</i> code 3E06317      |
| <i>ICD-10-CM</i> code 037G3-037G4                                                                                                                                          |                                    |
| Intravenous thrombolysis for ischemic stroke                                                                                                                               | <i>ICD-10-CM</i> code 3E03017      |
|                                                                                                                                                                            | <i>ICD-10-CM</i> code 3E03317      |
|                                                                                                                                                                            | <i>CPT</i> code 37195              |
| Mechanical ventilation                                                                                                                                                     | <i>ICD-10-CM</i> code 5A093        |
|                                                                                                                                                                            | <i>ICD-10-CM</i> code 5A095        |
|                                                                                                                                                                            | <i>ICD-10-CM</i> codes 5A193-5A195 |
| Any neurosurgical intervention                                                                                                                                             | <i>ICD-10-CM</i> code 00           |
| Any cardiac intervention                                                                                                                                                   | <i>ICD-10-CM</i> code 02           |
| Any vascular intervention                                                                                                                                                  | <i>ICD-10-CM</i> codes 03-07       |
| Abbreviations: <i>CPT</i> , Current Procedural Terminology; <i>ICD-10-CM</i> , International Classification of Diseases, 10 <sup>th</sup> Revision, Clinical Modification. |                                    |

**Table II. Urban-Rural Classification Scheme\* Used in Analysis of Access to Thrombectomy for Ischemic Stroke.**

| <b>Category</b> | <b>Description</b>                                              |
|-----------------|-----------------------------------------------------------------|
| 1               | "Central" counties of metro area of $\geq 1$ million population |
| 2               | "Fringe" counties of metro area of $\geq 1$ million population  |
| 3               | Counties in metro area of 250,000-999,999 population            |
| 4               | Counties in metro area of 50,000-249,999 population             |
| 5               | Micropolitan counties                                           |
| 6               | Noncore counties                                                |

\*This urban-rural classification scheme was developed for healthcare research by the National Center for Health Statistics.<sup>9</sup>

**Table III. Sensitivity Analyses of Initial Presentation with Ischemic Stroke to Thrombectomy Hubs versus Gateways versus Gaps\*.**

| Facility Type <sup>†</sup> | All Ischemic Stroke | Probable LVO <sup>‡</sup> | Received IV Thrombolysis | Presented to High-Volume Center <sup>§</sup> | Expanded Endovascular Therapy Definition <sup>  </sup> |
|----------------------------|---------------------|---------------------------|--------------------------|----------------------------------------------|--------------------------------------------------------|
| Hub                        | 48.7%               | 61.7%                     | 59.6%                    | 49.5%                                        | 52.9%                                                  |
| Gateway                    | 35.3%               | 31.3%                     | 30.5%                    | 35.5%                                        | 31.8%                                                  |
| Gap                        | 16.1%               | 7.0%                      | 9.9%                     | 15.0%                                        | 15.3%                                                  |

Abbreviations: IV, intravenous; LVO, large-vessel occlusion.

\*We classified a facility as a thrombectomy hub for ischemic stroke if it performed stroke thrombectomy in at least one stroke patient during the study period, a thrombectomy gateway if it did not perform any stroke thrombectomies but transferred out at least one stroke patient who received stroke thrombectomy at the receiving hospital, and a thrombectomy gap otherwise.

<sup>†</sup>Data are presented as number (%).

<sup>‡</sup>Defined as a National Institutes of Health Stroke Scale (NIHSS) score  $\geq 12$  among patients with documented NIHSS data. Data available for 22,188 patients.

<sup>§</sup>Defined as a facility that cared for at least 30 strokes during the study period.

<sup>||</sup>Endovascular stroke therapy included intra-arterial thrombolysis and intracranial angioplasty/stenting in addition to mechanical thrombectomy.

<sup>#</sup>Hubs with <10 endovascular procedures during the study period were excluded.

**Table IV. Temporal Trends in Initial Presentation with Ischemic Stroke to Thrombectomy Hubs versus Gateways versus Gaps\*.**

| <b>Facility Type<sup>†</sup></b> | <b>2016</b> | <b>2017-2018<sup>‡</sup></b> |
|----------------------------------|-------------|------------------------------|
| Hub                              | 48.0%       | 49.9%                        |
| Gateway                          | 33.2%       | 38.7%                        |
| Gap                              | 18.8%       | 11.4%                        |

\*We classified a facility as a thrombectomy hub if it performed thrombectomy in at least one stroke patient during the study period, a thrombectomy gateway if it did not perform any stroke thrombectomies but transferred out at least one stroke patient who received stroke thrombectomy at the receiving hospital, and a thrombectomy gap otherwise.

<sup>†</sup>Data are presented as number (%).<sup>‡</sup>Data for calendar years 2017 and 2018 were collapsed into one category given relatively smaller numbers in 2018.

**Table V. Sensitivity Analyses of Association between Initial Presentation to Thrombectomy Gateway (versus Hub) and Likelihood of Ultimately Undergoing Thrombectomy. \***

| <b>Facility Type<sup>†</sup></b> | <b>All Ischemic Stroke Patients</b> | <b>Adjusted for Estimated Stroke Severity</b> | <b>Probable LVO<sup>‡</sup></b> | <b>Received IV Thrombolysis</b> | <b>Presented to High-Volume Center<sup>§</sup></b> | <b>Stricter Definition of Endovascular Hub<sup>  </sup></b> | <b>Expanded Endovascular Therapy Definition<sup>#</sup></b> |
|----------------------------------|-------------------------------------|-----------------------------------------------|---------------------------------|---------------------------------|----------------------------------------------------|-------------------------------------------------------------|-------------------------------------------------------------|
| Hub                              | Ref.                                | Ref.                                          | Ref.                            | Ref.                            | Ref.                                               | Ref.                                                        | Ref.                                                        |
| Gateway                          | 0.27 (0.25-0.29)                    | 0.28 (0.26-0.30)                              | 0.36 (0.30-0.42)                | 0.13 (0.11-0.16)                | 0.25 (0.24-0.27)                                   | 0.22 (0.21-0.24)                                            | 0.29 (0.27-0.31)                                            |

Abbreviations: IV, intravenous; LVO, large-vessel occlusion.

\*We classified a facility as a thrombectomy hub for ischemic stroke if it performed stroke thrombectomy in at least one stroke patient during the study period, a thrombectomy gateway if it did not perform any stroke thrombectomies but transferred out at least one stroke patient who received stroke thrombectomy at the receiving hospital, and a thrombectomy gap otherwise.

<sup>†</sup>Reported data represent odds ratios and 95% confidence intervals for the association between presentation to a thrombectomy gateway (as opposed to a hub) and receipt of thrombectomy.

<sup>‡</sup>Defined as a National Institutes of Health Stroke Scale (NIHSS) score  $\geq 12$  among patients with documented NIHSS data. Data available for 22,188 patients.

<sup>§</sup>Defined as a facility that cared for at least 30 strokes during the study period.

<sup>||</sup>Hubs with <10 endovascular procedures during the study period were excluded.

<sup>#</sup>Endovascular stroke therapy included intra-arterial thrombolysis and intracranial angioplasty/stenting in addition to mechanical thrombectomy.

**Table VI. Characteristics of Patients with Ischemic Stroke, Stratified by Thrombectomy Access\* at Initial Healthcare Facility.**

| Patient Characteristic <sup>†</sup>                    | Thrombectomy Hub<br>(N = 100,139) | Thrombectomy Gateway<br>(N = 72,534) | Thrombectomy Gap<br>(N = 33,008) |
|--------------------------------------------------------|-----------------------------------|--------------------------------------|----------------------------------|
| Age, mean (SD), y                                      | 70 (15)                           | 71 (14)                              | 71 (14)                          |
| Female                                                 | 49,927 (49.9)                     | 36,761 (50.7)                        | 17,154 (52.0)                    |
| Race <sup>‡</sup>                                      |                                   |                                      |                                  |
| White                                                  | 61,476 (61.4)                     | 51,113 (70.5)                        | 22,741 (68.9)                    |
| Black                                                  | 22,773 (22.7)                     | 13,824 (19.1)                        | 7,022 (21.3)                     |
| Hispanic                                               | 10,121 (10.1)                     | 3,777 (5.2)                          | 1,947 (5.9)                      |
| Asian                                                  | 1,505 (1.5)                       | 1,522 (2.1)                          | 384 (1.2)                        |
| Other                                                  | 4,264 (4.3)                       | 2,298 (3.2)                          | 914 (2.8)                        |
| Payment source                                         |                                   |                                      |                                  |
| Medicare                                               | 66,622 (66.5)                     | 50,601 (69.8)                        | 22,888 (69.3)                    |
| Medicaid                                               | 9,740 (9.7)                       | 5,140 (7.1)                          | 2,804 (8.5)                      |
| Private insurance                                      | 16,831 (16.8)                     | 11,084 (15.3)                        | 5,094 (15.4)                     |
| Other                                                  | 6,946 (6.9)                       | 5,709 (7.9)                          | 2,222 (6.7)                      |
| Rural location of residence <sup>§</sup>               | 9,721 (9.7)                       | 8,813 (12.2)                         | 13,487 (40.9)                    |
| Socioeconomic advantage score, mean (SD) <sup>  </sup> | 4.6 (4.4)                         | 4.3 (4.6)                            | 3.6 (5.8)                        |
| Charlson comorbidity index, mean (SD)                  | 2.8 (1.4)                         | 2.7 (1.4)                            | 2.6 (1.3)                        |
| NIHSS score, median (IQR) <sup>#</sup>                 | 5 (2-11)                          | 4 (2-8)                              | 4 (2-8)                          |

Abbreviations: IQR, interquartile range; NIHSS, National Institutes of Health Stroke Scale; SD, standard deviation.

\*We classified a facility as a thrombectomy hub for ischemic stroke if it performed stroke thrombectomy in at least one stroke patient during the study period, a thrombectomy gateway if it did not perform any stroke thrombectomies but transferred out at least one stroke patient who received stroke thrombectomy at the receiving hospital, and a thrombectomy gap otherwise.

<sup>†</sup>Data are presented as number (%) unless otherwise specified.

<sup>‡</sup>Self-reported by patients or their surrogates.

<sup>§</sup>Defined as nonmetropolitan location according to the urban-rural classification scheme developed by the National Center for Health Statistics.<sup>9</sup>

<sup>||</sup>Aggregate zip-code level socioeconomic advantage score calculated from American Community Survey data using previously published methods.<sup>10</sup>

<sup>#</sup>National Institutes of Health Stroke Scale (NIHSS) scores encoded in *ICD-10-CM* discharge codes.<sup>15</sup> Data available for 22,188 patients.

**Table VII. Adjusted Probabilities of Relevant Clinical Services Available to Ischemic Stroke Patients at Initial Facility\*.**

| Clinical Service <sup>†</sup>       | Thrombectomy Gateway<br>(N = 72,534) | Thrombectomy Gap<br>(N = 33,008) |
|-------------------------------------|--------------------------------------|----------------------------------|
| Intravenous thrombolysis            | 94.7%                                | 80.9%                            |
| Mechanical ventilation <sup>‡</sup> | 99.6%                                | 98.5%                            |
| Any neurosurgical intervention      | 99.4%                                | 97.6%                            |
| Any cardiac intervention            | 99.7%                                | 98.2%                            |
| Any vascular intervention           | 99.8%                                | 98.7%                            |

\*We classified a facility as a thrombectomy hub if it performed stroke thrombectomy in at least one stroke patient during the study period, a thrombectomy gateway if it did not perform any stroke thrombectomies but transferred out at least one stroke patient who received stroke thrombectomy at the receiving hospital, and a thrombectomy gap otherwise.

<sup>†</sup>A clinical service was considered to be available if any procedure within that broad category was performed at a site at least once during the study period. Reported percentages reflect probabilities of each service after adjustment for age, sex, race, insurance, socioeconomic status, urban-rural location of residence, and Charlson comorbidity index.

<sup>‡</sup>For patients admitted to the hospital, not patients in the emergency department.



**Figure 1**

*Title:* Flow Diagram of Patients Included in Analysis of Access to Thrombectomy for Ischemic Stroke.

*Caption:* Mimics were defined as patients with a stroke diagnosis at the initial facility but no such diagnosis at the receiving facility. Cross-border transfers were defined as patients transferred to a hospital for which we had no linked records.

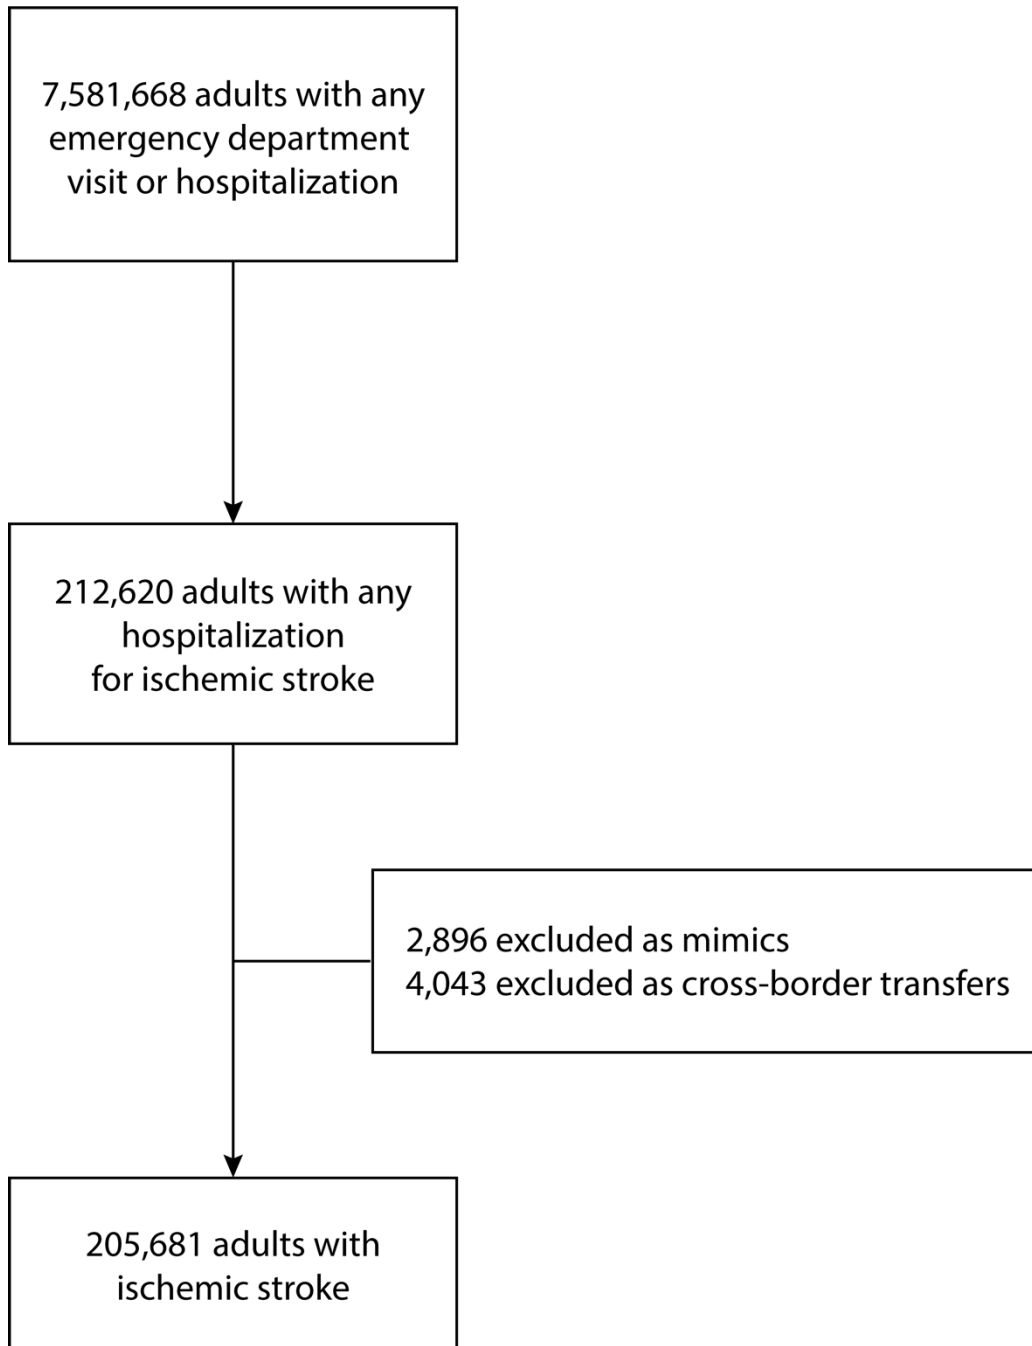

## Figure II

*Title.* Demographic Characteristics of Ischemic Stroke Patients and Probability of Presenting to Stroke Thrombectomy Hub versus Gateway versus Gap.

*Caption.* All probabilities were adjusted for age, sex, race, insurance, socioeconomic status, urban-rural location of residence, and Charlson comorbidity index.

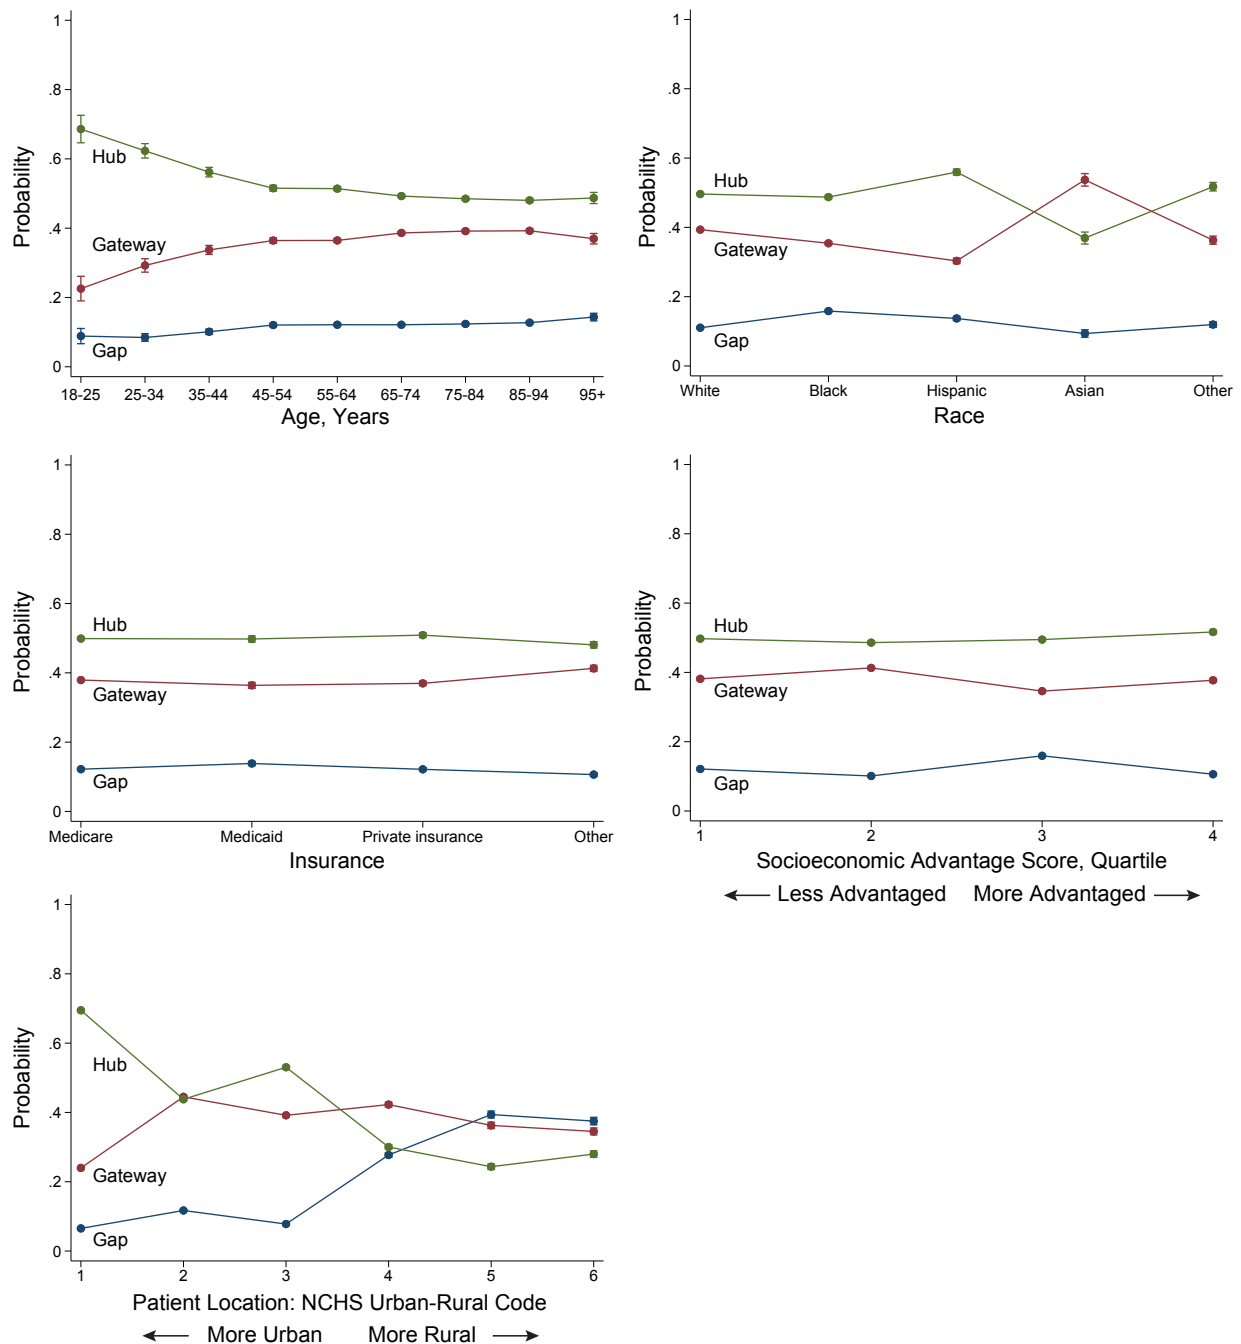

**Figure III. Sensitivity Analyses of Ischemic Stroke Patients' Urban-Rural Location of Residence and Presentation to Stroke Thrombectomy Hub versus Gateway versus Gap.**

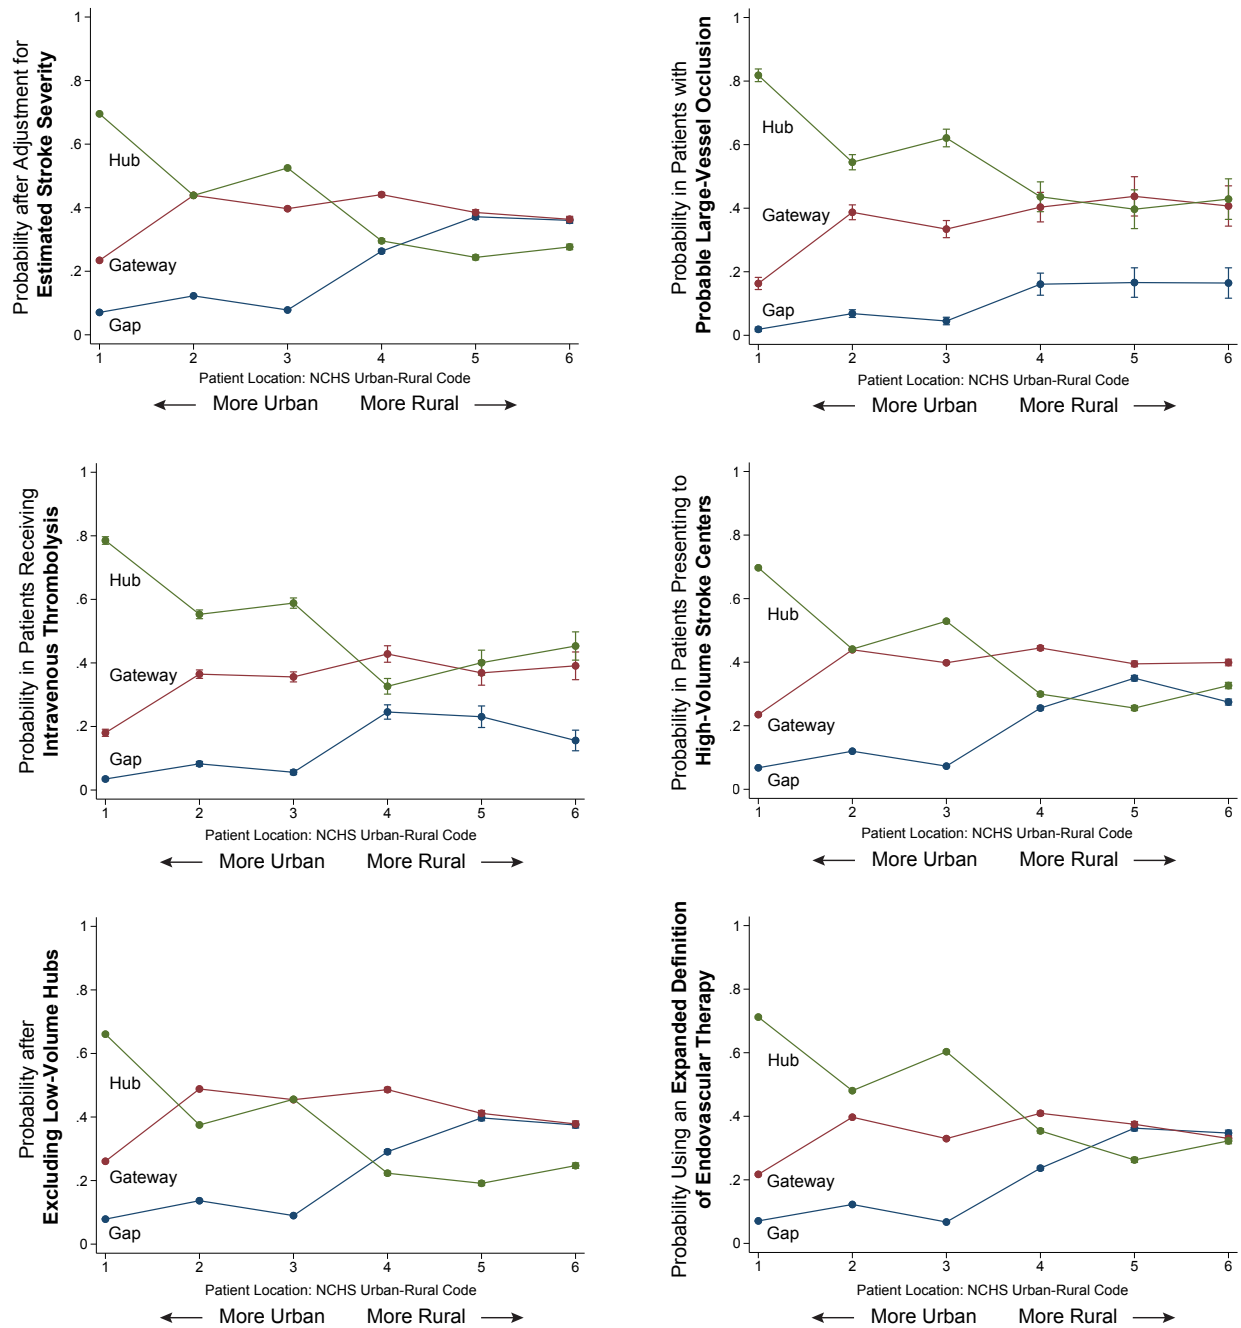

**Figure IV.**

*Title:* Proportion of Patients with Ischemic Stroke and Myocardial Infarction Presenting to an Endovascular Treatment Hub, by ZIP Code.

*Caption:* Maps from New York, Vermont, and Florida are shown in Figure 2 in the main manuscript. Maps from Iowa, Maryland, and Massachusetts could not be created because ZIP-code data were not available. Proportions are mapped according to the color scheme below:

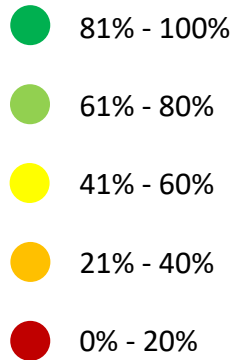

Figure IVa. Arkansas.

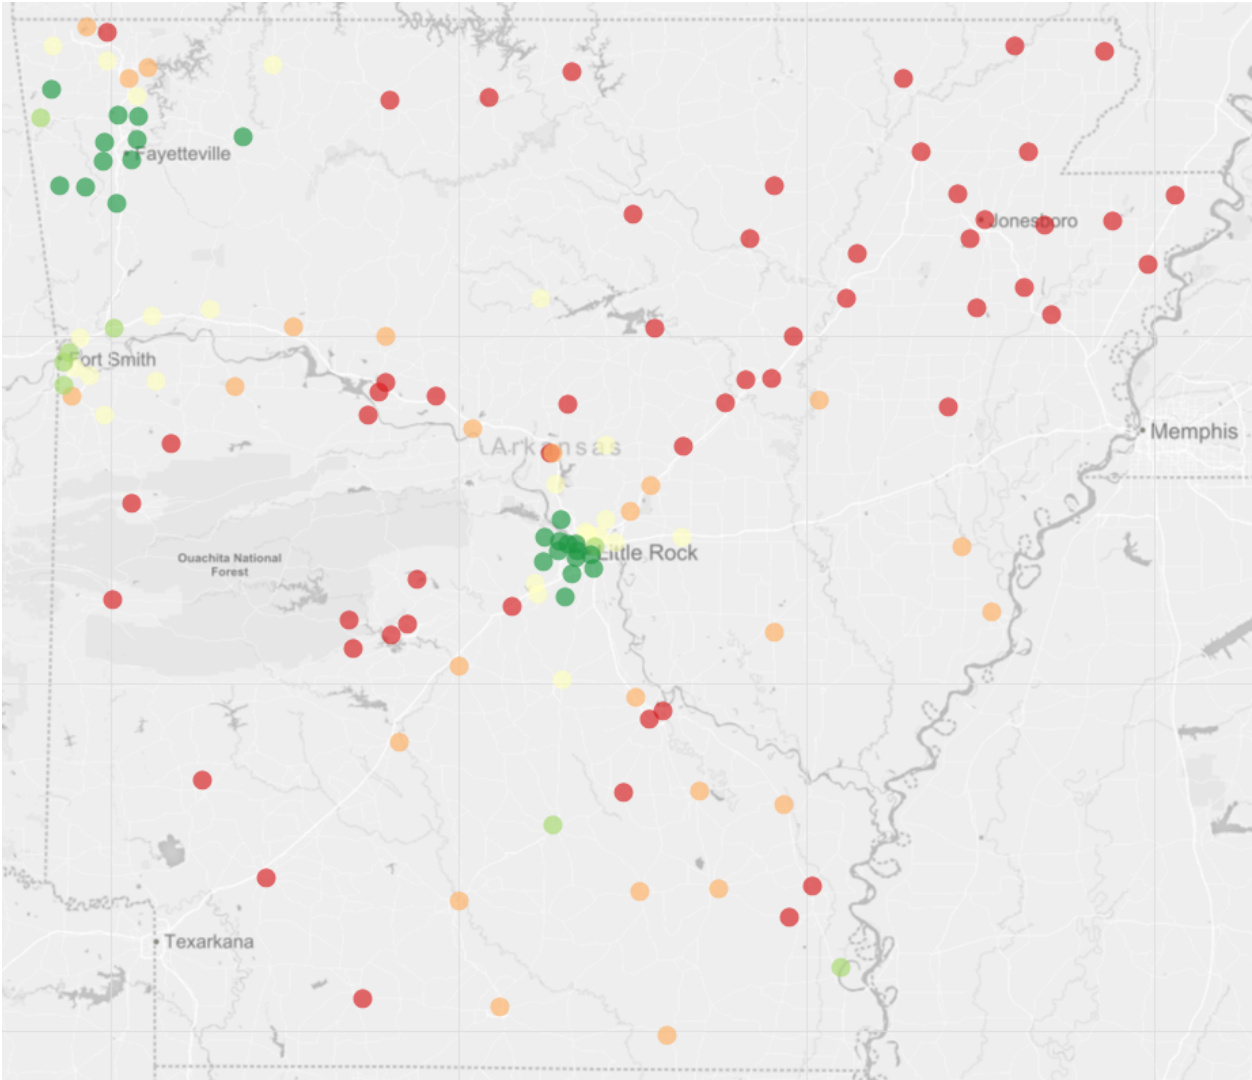

Figure IVb. Georgia.

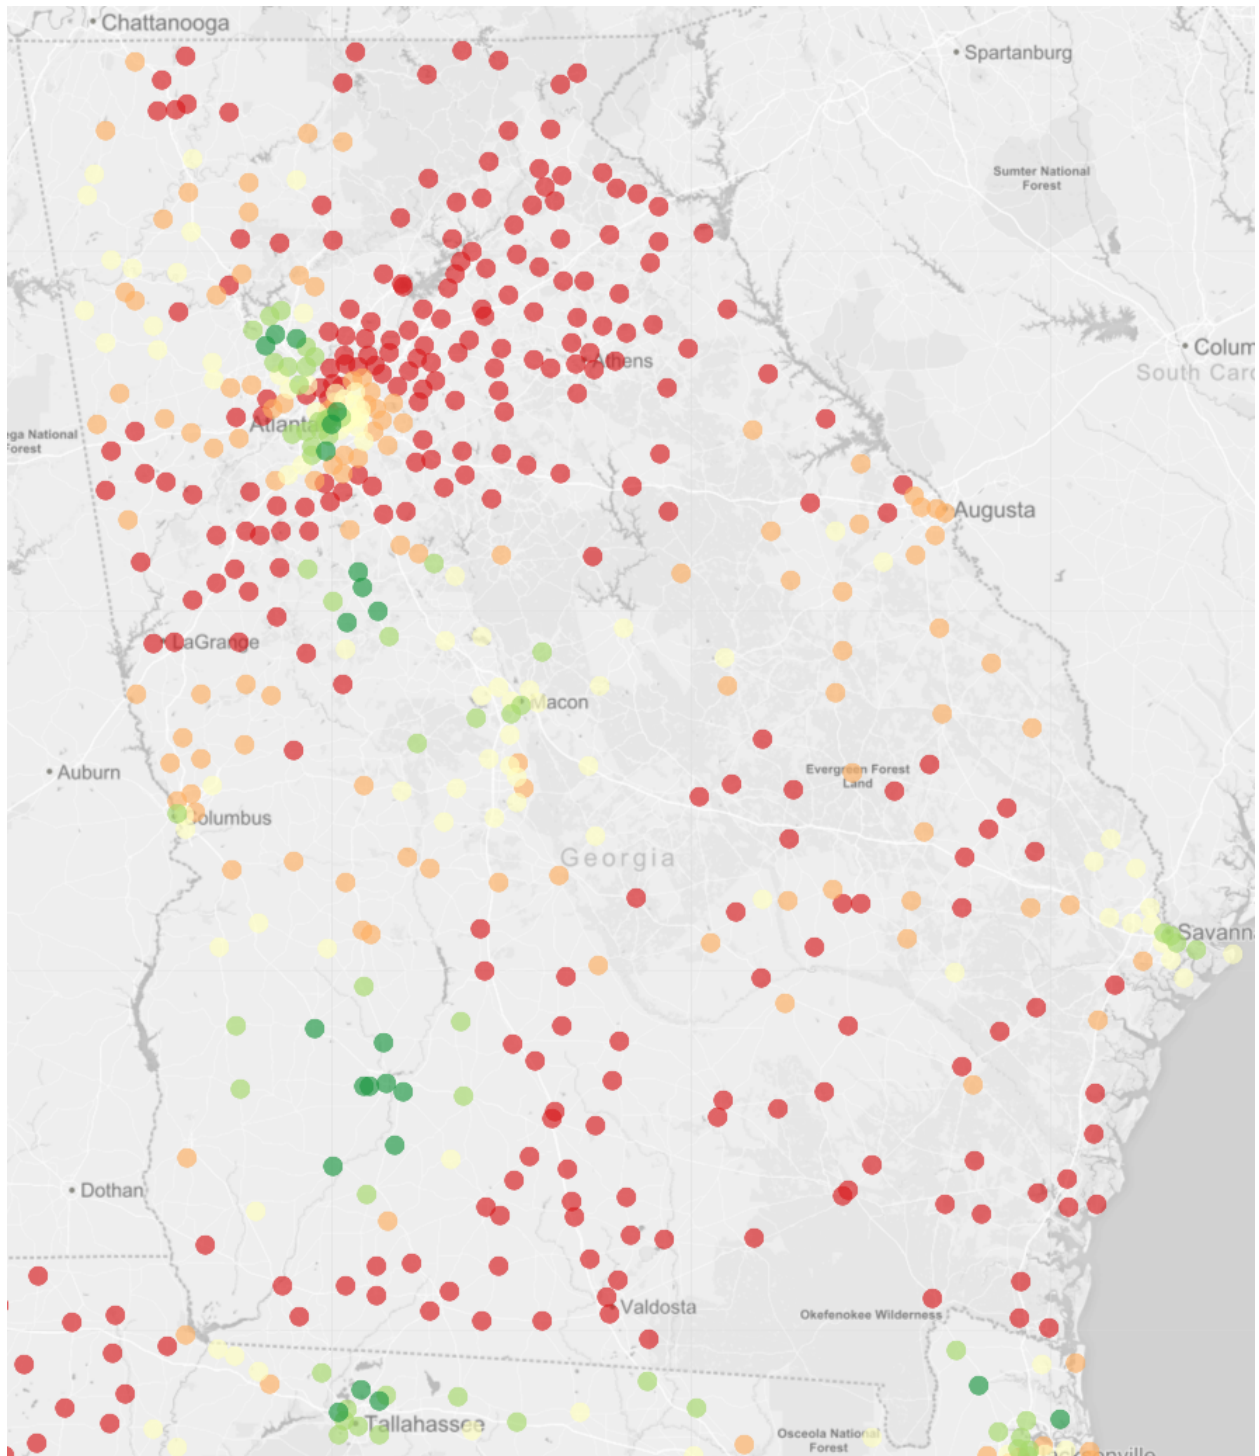

Figure IVc. Nebraska.

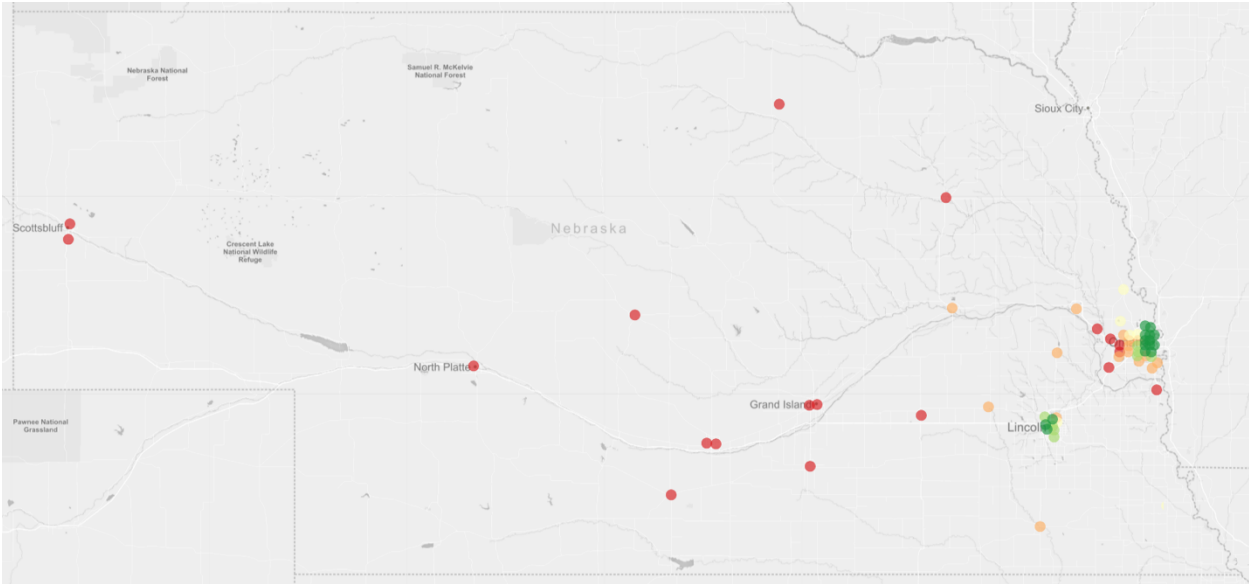

Figure IVd. Utah.

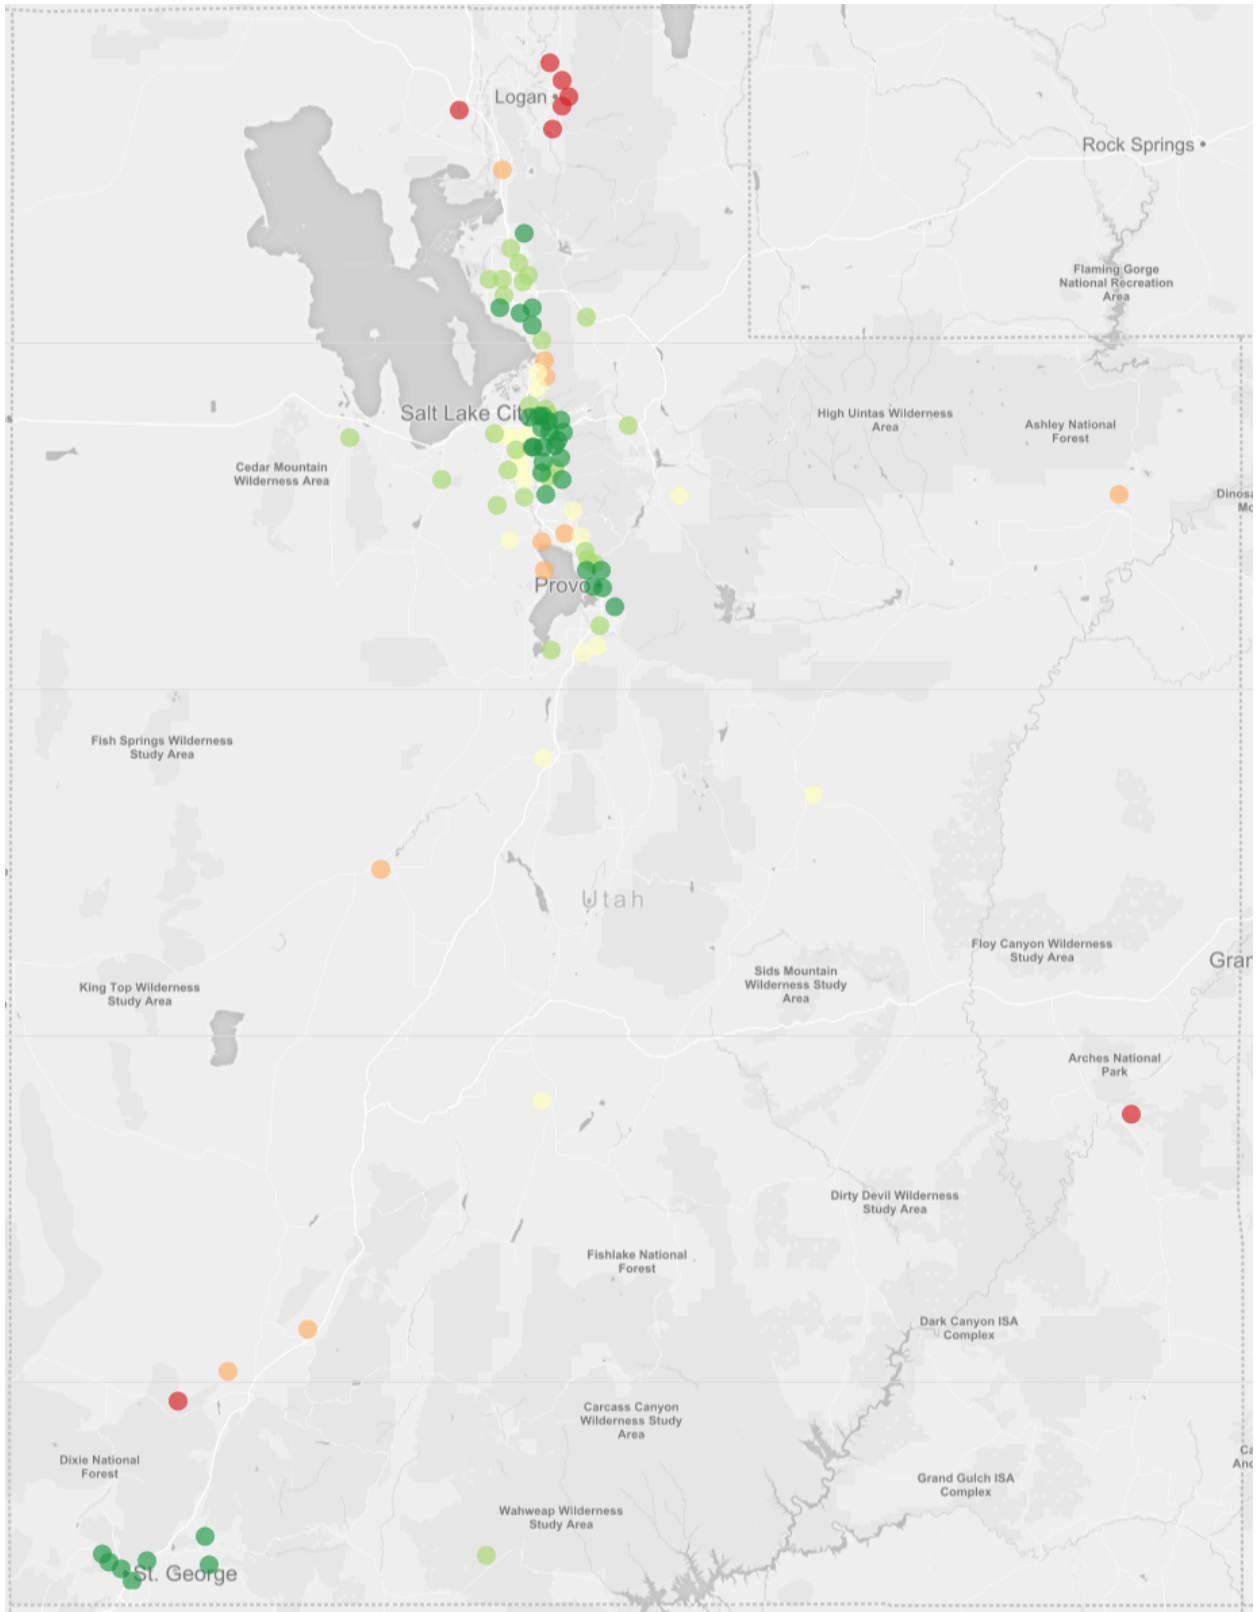



Figure IVe. Wisconsin.

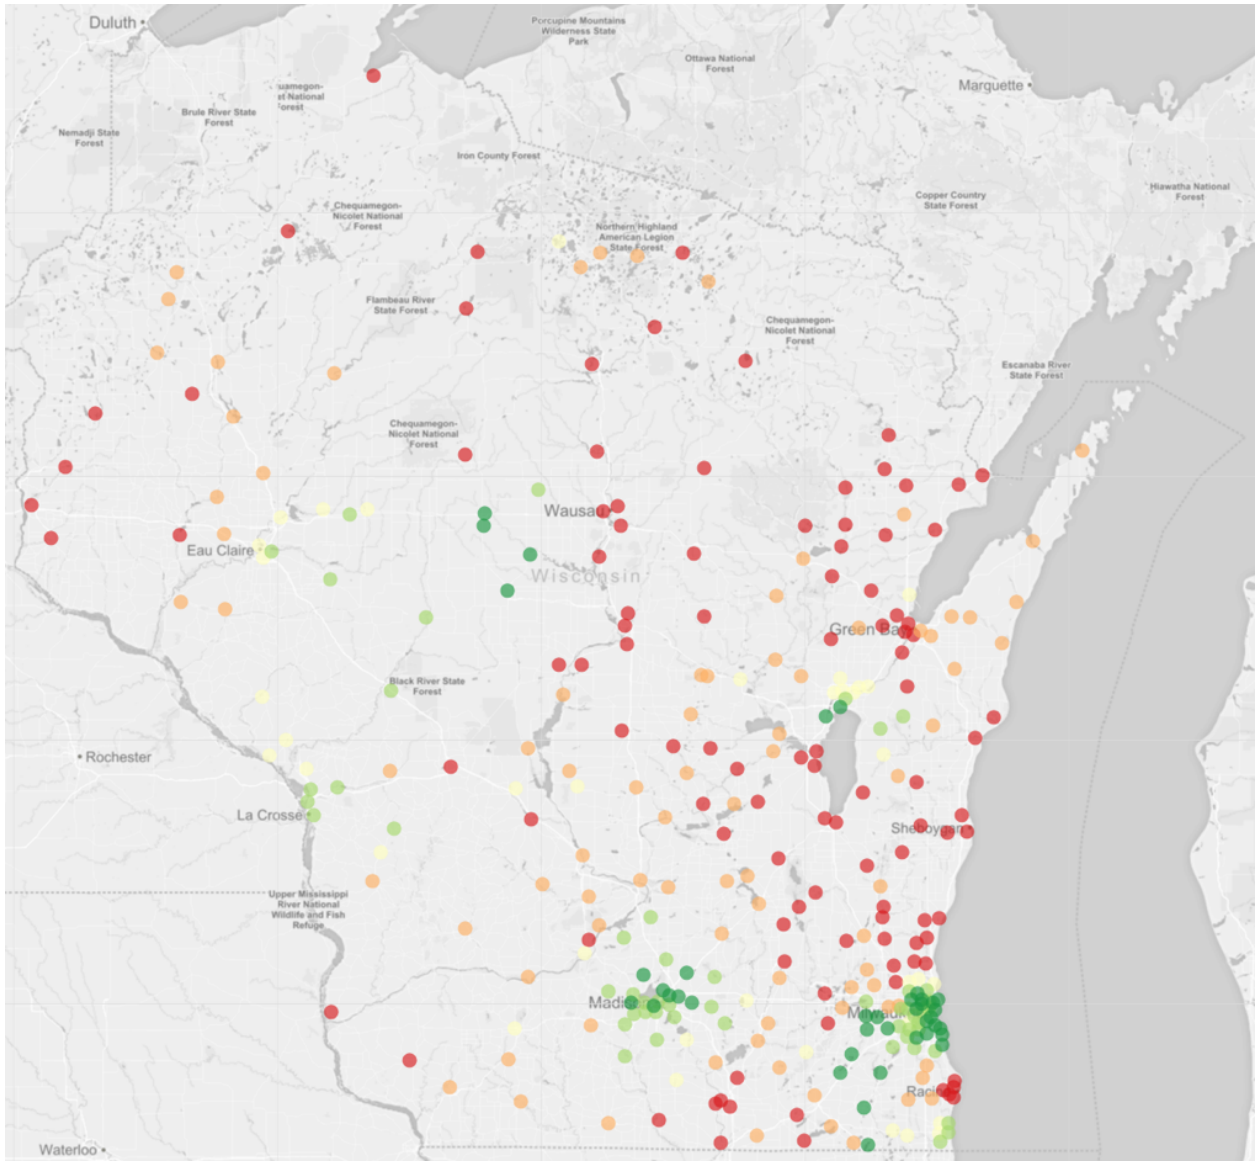

Supplement: NIHMS1696541-supplement-Supplemental_Publication_Material.pdf [file NIHMS1696541-supplement-Supplemental_Publication_Material.pdf]
